# Supplementary material for: Chest tube-free video-assisted thoracoscopic surgery secured by quantitative air leak monitoring: a case series
Source: PubMed Central journal article supplement — J Thorac Dis. 2023 Jan 9;15(1):146–54. doi: 10.21037/jtd-22-1749 (PMC9922591; doi:10.21037/jtd-22-1749), 2023-01-09
Supplement: jtd-15-01-146-dss.pdf [file jtd-15-01-146-dss.pdf]

## Data Sharing Statement

|                     |                                                                                                                                                     |                                                                                                              |
|---------------------|-----------------------------------------------------------------------------------------------------------------------------------------------------|--------------------------------------------------------------------------------------------------------------|
| <b>Article Info</b> | <a href="https://dx.doi.org/10.21037/jtd-22-1749">https://dx.doi.org/10.21037/jtd-22-1749</a>                                                       |                                                                                                              |
| <b>Item</b>         | <b>Question</b>                                                                                                                                     | <b>Authors' Response<br/>(place "-" if not applicable)</b>                                                   |
| 1                   | Would you like to share data collected for your study to others?                                                                                    | Yes.                                                                                                         |
| 2                   | If not, would you like to share the reason for your decision?                                                                                       | -                                                                                                            |
| 3                   | What data in particular will be shared?                                                                                                             | Original masked patient data.                                                                                |
| 4                   | Any other documents will be shared? Such as study protocol, statistical analysis plan, informed consent form, clinical study report, analytic code. | No.                                                                                                          |
| 5                   | When will data availability begin?                                                                                                                  | From the publication date.                                                                                   |
| 6                   | When will data availability end?                                                                                                                    | Two years within the publication date.                                                                       |
| 7                   | To whom will you share the data?                                                                                                                    | Scientific researchers of similar interests.                                                                 |
| 8                   | For what type of analysis or purpose?                                                                                                               | Scientific researches of similar interests.                                                                  |
| 9                   | How or where can the data/documents be obtained?                                                                                                    | Request by email sent to the corresponding author.                                                           |
| 10                  | Any other restrictions?                                                                                                                             | We may balance the potential benefits and risks for each request. Redistribution of the data is not allowed. |
